# Supplementary material for: Electives in the medical curriculum – an opportunity to achieve students’ satisfaction?
Source: PubMed Central journal article supplement (PMC7681969; doi:10.1186/s12909-020-02269-0), 2020-11-23

**Assessment components**

6.1. Do you agree with the current assessment components in this elective?

- No **if not**, go forward to **question 6.3**.
- Yes **if yes**, go forward to **question 6.2**.

6.2. 2 Do you agree with the weight attributed to each of the components in this elective?

- No **if not**, go forward to **question 6.3**.
- Yes **if yes**, go forward to **question 7**.

**6.3. Point which assessment components of the elective and the corresponding weight that should be assigned to each component (making a total of 100%). If you answered No in question 6.2 point the weight that should be assigned in the assessment components that are included in the elective (making a total of 100%).**

|                   |                          |                           |                                   |                                                                                                                                                                                                                                |  |  |  |   |
|-------------------|--------------------------|---------------------------|-----------------------------------|--------------------------------------------------------------------------------------------------------------------------------------------------------------------------------------------------------------------------------|--|--|--|---|
| Final Exam        | <input type="radio"/> No | <input type="radio"/> Yes | <b>if yes</b> , point the weight: | <table border="1" style="display: inline-table; vertical-align: middle;"><tr><td style="width: 20px; height: 20px;"></td><td style="width: 20px; height: 20px;"></td><td style="width: 20px; height: 20px;"></td></tr></table> |  |  |  | % |
|                   |                          |                           |                                   |                                                                                                                                                                                                                                |  |  |  |   |
| Attendance        | <input type="radio"/> No | <input type="radio"/> Yes | <b>if yes</b> , point the weight: | <table border="1" style="display: inline-table; vertical-align: middle;"><tr><td style="width: 20px; height: 20px;"></td><td style="width: 20px; height: 20px;"></td><td style="width: 20px; height: 20px;"></td></tr></table> |  |  |  | % |
|                   |                          |                           |                                   |                                                                                                                                                                                                                                |  |  |  |   |
| Test (frequency)  | <input type="radio"/> No | <input type="radio"/> Yes | <b>if yes</b> , point the weight: | <table border="1" style="display: inline-table; vertical-align: middle;"><tr><td style="width: 20px; height: 20px;"></td><td style="width: 20px; height: 20px;"></td><td style="width: 20px; height: 20px;"></td></tr></table> |  |  |  | % |
|                   |                          |                           |                                   |                                                                                                                                                                                                                                |  |  |  |   |
| Written work      | <input type="radio"/> No | <input type="radio"/> Yes | <b>if yes</b> , point the weight: | <table border="1" style="display: inline-table; vertical-align: middle;"><tr><td style="width: 20px; height: 20px;"></td><td style="width: 20px; height: 20px;"></td><td style="width: 20px; height: 20px;"></td></tr></table> |  |  |  | % |
|                   |                          |                           |                                   |                                                                                                                                                                                                                                |  |  |  |   |
| Oral test         | <input type="radio"/> No | <input type="radio"/> Yes | <b>if yes</b> , point the weight: | <table border="1" style="display: inline-table; vertical-align: middle;"><tr><td style="width: 20px; height: 20px;"></td><td style="width: 20px; height: 20px;"></td><td style="width: 20px; height: 20px;"></td></tr></table> |  |  |  | % |
|                   |                          |                           |                                   |                                                                                                                                                                                                                                |  |  |  |   |
| Laboratorial work | <input type="radio"/> No | <input type="radio"/> Yes | <b>if yes</b> , point the weight: | <table border="1" style="display: inline-table; vertical-align: middle;"><tr><td style="width: 20px; height: 20px;"></td><td style="width: 20px; height: 20px;"></td><td style="width: 20px; height: 20px;"></td></tr></table> |  |  |  | % |
|                   |                          |                           |                                   |                                                                                                                                                                                                                                |  |  |  |   |

**Classes Typology**

7.1. Do you agree with the current classes typologies in this elective?

- No **if not**, go forward to **question 7.2**.
- Yes **if yes**, go forward to **question 8**.

**7.2. Point which should be the classes typologies in this elective:**

|                       |                          |                           |           |                          |                           |        |                                                          |
|-----------------------|--------------------------|---------------------------|-----------|--------------------------|---------------------------|--------|----------------------------------------------------------|
| Theoretical           | <input type="radio"/> No | <input type="radio"/> Yes | Practical | <input type="radio"/> No | <input type="radio"/> Yes | Other: | <input style="width: 200px; height: 20px;" type="text"/> |
| Theoretical-Practical | <input type="radio"/> No | <input type="radio"/> Yes | Seminar   | <input type="radio"/> No | <input type="radio"/> Yes |        |                                                          |

8. The following scale assesses the amount of work invested in 6 dimensions. For each one of the dimensions point in a scale from 1 to 10, in which 1=Low and 10=High, the answer that best represents your level of effort for the completion of this elective.

|                                                                                                      |                                                                                                                                                                                                                                                                                                                                                                                                                                                                                                                                                                                                                                                                 |  |  |  |  |  |  |  |  |  |  |  |  |
|------------------------------------------------------------------------------------------------------|-----------------------------------------------------------------------------------------------------------------------------------------------------------------------------------------------------------------------------------------------------------------------------------------------------------------------------------------------------------------------------------------------------------------------------------------------------------------------------------------------------------------------------------------------------------------------------------------------------------------------------------------------------------------|--|--|--|--|--|--|--|--|--|--|--|--|
| Mental Effort: Which was the level of mental effort and perception demanded?                         | <table border="1" style="display: inline-table;"><tr><td style="width: 20px; height: 20px;"></td><td style="width: 20px; height: 20px;"></td></tr><tr><td style="width: 20px; height: 20px;"></td><td style="width: 20px; height: 20px;"></td></tr></table> |  |  |  |  |  |  |  |  |  |  |  |  |
|                                                                                                      |                                                                                                                                                                                                                                                                                                                                                                                                                                                                                                                                                                                                                                                                 |  |  |  |  |  |  |  |  |  |  |  |  |
|                                                                                                      |                                                                                                                                                                                                                                                                                                                                                                                                                                                                                                                                                                                                                                                                 |  |  |  |  |  |  |  |  |  |  |  |  |
|                                                                                                      |                                                                                                                                                                                                                                                                                                                                                                                                                                                                                                                                                                                                                                                                 |  |  |  |  |  |  |  |  |  |  |  |  |
|                                                                                                      |                                                                                                                                                                                                                                                                                                                                                                                                                                                                                                                                                                                                                                                                 |  |  |  |  |  |  |  |  |  |  |  |  |
|                                                                                                      |                                                                                                                                                                                                                                                                                                                                                                                                                                                                                                                                                                                                                                                                 |  |  |  |  |  |  |  |  |  |  |  |  |
|                                                                                                      |                                                                                                                                                                                                                                                                                                                                                                                                                                                                                                                                                                                                                                                                 |  |  |  |  |  |  |  |  |  |  |  |  |
| Physical Effort: Which was the level of physical effort demanded?                                    |                                                                                                                                                                                                                                                                                                                                                                                                                                                                                                                                                                                                                                                                 |  |  |  |  |  |  |  |  |  |  |  |  |
| Temporal Effort: Which was the level of pressure imposed by the time to complete the activities?     |                                                                                                                                                                                                                                                                                                                                                                                                                                                                                                                                                                                                                                                                 |  |  |  |  |  |  |  |  |  |  |  |  |
| Performance: Which was the level of success felt in the accomplishment of the aims?                  |                                                                                                                                                                                                                                                                                                                                                                                                                                                                                                                                                                                                                                                                 |  |  |  |  |  |  |  |  |  |  |  |  |
| Effort: Which was the level of effort that you had to spend to accomplish your results?              |                                                                                                                                                                                                                                                                                                                                                                                                                                                                                                                                                                                                                                                                 |  |  |  |  |  |  |  |  |  |  |  |  |
| Frustration: Which was the level of insecurity, discouragement, irritation and stress that you felt? |                                                                                                                                                                                                                                                                                                                                                                                                                                                                                                                                                                                                                                                                 |  |  |  |  |  |  |  |  |  |  |  |  |

Strengths / Weaknesses / Opportunities / Threats

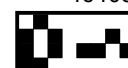

Supplement: 12909_2020_2269_MOESM1_ESM.pdf [file 12909_2020_2269_MOESM1_ESM.pdf]
